# Supplementary material
Source: MDPI journal article supplement (https://www.mdpi.com/2075-163X/11/3/261)
Supplement: s1 [file s1]

## Sheet: Legend
		Supplementary material for the following article:
		Intrusion-associated gold systems and multistage metallogenic processes in the Neoarchean Abitibi greenstone belt
		by L. Mathieu (lucie1.mathieu@uqac.ca)
		Journal: MDPI - Minerals
	Tables:
		S1	Table S1. Main physical characteristics of the deposits described in the text.
		S2	Table S2. Compilation of tonnage, grade and geochronological data.
		S3	Table S3. Compilation of isotopic data.
	References cited in this document:
		Ayer, J.A. et al., 2005, Digital compilation of maps and data from the Greenstone Architecture Project in the Timmins–Kirkland Lake region: Miscellaneous Release - Data 155, Ontario Geological Survey, Sudbury, ON, Canada, 10 p.
		Barrie, C.T., and Krogh, T.E., 1996, U-Pb zircon geochronology of the Selbaie Cu-Zn-Ag-Au mine, Abitibi Subprovince, Canada: Economic Geology, v. 91, p. 563–575.
		Belzile, E., and Gignac, L.P., 2011, Updated resource and reserve estimates for the Canadian Malartic project Malartic, Quebec: Technical report NI 43-101, 261 p.
		Berger, B.R., 2006, Geological synthesis along Highway 66 from Matachewan to Swastika: Ontario Geological Survey, Open File report 6177, 125 p.
		Bigot, F., 2020, Les minéralisations à Cu-Au de type skarn du stock de East-Sullivan, ceinture de roches vertes de l’Abitibi, Canada: Unpublished Master thesis, UQAM University, Montréal, QC, Canada, 184 p.
		Bigot, L., and Jébrak, M., 2015, Gold mineralization at the syenite-hosted Beattie gold deposit, Duparquet, Neoarchean Abitibi Belt, Canada: Economic Geology, v. 110, p. 315–335.
		van Breemen, O., Heather, K.B., and Ayer, J.A., 2006, U-Pb geochronology of the Neoarchean Swayze sector of the southern Abitibi greenstone belt: Current Research no. 2006-F1, Ontario Geological Survey, Sudbury, Ontario, Canada, 32 p., doi:10.4095/223016.
		Cameron, E.M., and Hattori, K., 1987, Archean gold mineralization and oxidized hydrothermal fluids: Economic Geology, v. 82, p. 1177–1191.
		Campbell, R.A., 2014, Controls on syenite-hosted gold mineralization in the western Timmins camp: Unpublished Master thesis, University of Western Ontario, London, ON, Canada, 159 p.
		Carignan, J., and Gariepy, C., 1993, Pb isotope geochemistry of the Silidor and Launay gold deposits; implications for the source of Archean Au in the Abitibi Subprovince: Economic Geology, v. 88, p. 1722–1730.
		Carrier, A., Jébrak, M., Angelier, J., and Holyland, P., 2000, The Silidor deposit, Rouyn-Noranda district, Abitibi belt: Geology, structural evolution, and paleostress modeling of an Au quartz vein-type deposit in an Archean trondhjemite: Economic Geology, v. 95, p. 1049–1065.
		Corfu, F., Krogh, T.E., Kwok, Y.Y., and Jensen, L.S., 1989, U-Pb zircon geochronology in the southwestern Abitibi greenstone belt, Superior Province: Canadian Journal of Earth Sciences, v. 26, p. 1747–1763, doi:10.1139/e89-148.
		Crick, D., Kusins, R., and Powers, D., 2011, Technical report on the initial mineral resource estimate for the “Thunder Creek property”, Bristol township, west of Timmins, Ontario, Canada: Technical report NI 43-101, addressed to Lake Shore Gold Corp. and West TImmins Mining Inc., 267 p.
		David, J., 2019, Datations U-Pb dans les provinces du Supérieur et de Churchill effectuées au GEOTOP en 2014-2015: Ministère de l’Énergie et des Ressources Naturelles du Québec; MB 2019-03, 25 p.
		David, J., and Parent, M., 1997, Géochronologie U-Pb du Projet Moyen-Nord: MRNF document GM 59903; Ministère des Ressources Naturelles et de la Faune: Québec, QC, Canada, 90 p.
		Davis, W.J., Lacroix, S., Gariépy, C., and Machado, N., 2000, Geochronology and radiogenic isotope geochemistry of plutonic rocks from the central Abitibi subprovince: significance to the internal subdivision and plutono-tectonic evolution of the Abitibi belt: Canadian Journal of Earth Sciences, v. 37, p. 117–133.
		Fayol, N., and Jébrak, M., 2017, Archean sanukitoid gold porphyry deposits: a new understanding and genetic model from the Lac Bachelor gold deposit, Abitibi, Canada: Economic Geology, v. 112, p. 1913–1936.
		Feick, K.E., 2016, An evaluation of the lithologies and geochemistry of the Upper Beaver deposit of the Kirkland Lake area: Unpublished Master thesis, Western University, London, ON, Canada, 403 p.
		Gosselin, P., and Dubé, B., 2005, Gold deposits of the world: distribution, geological parameters and gold content: Geological Survey of Canada Open File 4895, 271 p.
		Helt, K.M., Williams-Jones, A.E., Clark, J.R., Wing, B.A., and Wares, R.P., 2014, Constraints on the genesis of the Archean oxidized, intrusion-related Canadian Malartic gold deposit, Quebec, Canada: Economic Geology, v. 109, p. 713–735.
		Ispolatov, V., Lafrance, B., Dubé, B., Creaser, R., and Hamilton, M., 2008, Geologic and structural setting of gold mineralization in the Kirkland Lake-Larder Lake gold belt, Ontario: Economic Geology, v. 103, p. 1309–1340.
		Jébrak, M., Harnois, L., Carrier, A., and Lafrance, J., 1996, Le porphyre à Cu-Au de Don Rouyn, in Couture, J.-F. and Goutier, J. eds., Métallogénie et évolution tectonique de la région de Rouyn-Noranda, MERN report MB 96-06; Ministère de l’Énergie et des Ressources Naturelles: Québec, QC, Canada, p. 85–86.
		Katz, L.R., 2016, Geology of the Archean Côté Gold Au (-Cu) intrusion-related deposit, Swayze greenstone belt, Ontario: Unpublished PhD thesis, Laurentian University, Sudbury, ON, Canada, 347 p.
		Kerrich, R., and Watson, G.P., 1984, The Macassa Mine Archean lode gold deposit, Kirkland Lake, Ontario; geology, patterns of alteration, and hydrothermal regimes: Economic Geology, v. 79, p. 1104–1130.
		Krogh, T.E., 1982, Improved accuracy of U-Pb zircon ages by the creation of more concordant systems using an air abrasion technique: Geochimica et Cosmochimica Acta, v. 46, p. 637–649.
		Krogh, T.E., and Davis, G.L., 1971, Zircon U-Pb ages of Archean metavolcanic rocks in the Canadian Shield: Carnegie Institution of Washington Yearbook, v. 69, p. 241–242.
		Lafrance, B., Davis, D.W., Goutier, J., Moorhead, J., Pilote, P., Mercier-Langevin, P., Dubé, B., Galley, A.G., and Mueller, W.U., 2005, Nouvelles datations isotopiques dans la portion québécoise du Groupe de Blake River et des unités adjacentes: MRNF report RG 2005-01; Ministère des Ressources Naturelles et de la Faune: Québec, QC, Canada, 15 p.
		Leclerc, F., Harris, L.B., Bédard, J.H., Van Breemen, O., and Goulet, N., 2012, Structural and stratigraphic controls on magmatic, volcanogenic, and shear zone-hosted mineralization in the Chapais-Chibougamau mining camp, northeastern Abitibi, Canada (1,2): Economic Geology, v. 107, p. 963–969, doi:10.2113/econgeo.107.5.963.
		Martin, R.D., 2012, Syenite-hosted gold mineralization and hydrothermal alteration at the Young-Davidson deposit, Matachewan, Ontario: Unpublished Master thesis, University of Waterloo, Waterloo, ON, Canada, 188 p.
		McNeil, A.M., and Kerrich, R., 1986, Archean lamprophyre dykes and gold mineralization, Matheson, Ontario: the conjunction of LILE-enriched mafic magmas, deep crustal structures, and Au concentration: Canadian Journal of Earth Sciences, v. 23, p. 324–343.
		McNicoll, V., Goutier, J., Dubé, B., Mercier-Langevin, P., Ross, P.-S., Dion, C., Monecke, T., Legault, M., Percival, J., and Gibson, H., 2014, U-Pb geochronology of the Blake River Group, Abitibi greenstone belt, Quebec, and implications for base metal exploration: Economic Geology, v. 109, p. 27–59.
		Morasse, S., 1988, Geological setting and evolution of the Lac Shortt gold deposit, Waswanipi, Quebec, Canada: Unpublished MSc thesis, Kingston, Ontario, Queen’s University, 234 p.
		Morasse, S., Wasteneys, H.A., Cormier, M., Helmstaedt, H., and Mason, R., 1995, A pre-2686 Ma intrusion-related gold deposit at the Kiena Mine, Val d’Or, Quebec, southern Abitibi Subprovince: Economic Geology, v. 90, p. 1310–1321.
		Mueller, W.U., Daigneault, R., Mortensen, J.K., and Chown, E.H., 1996, Archean terrane docking: upper crust collision tectonics, Abitibi greenstone belt, Quebec, Canada: Tectonophysics, v. 265, p. 127–150.
		Naderi, N., 2012, Stable isotopes and XRD investigation of gold mineralization at the syenite-hosted Young-Davidson deposit, Matachewan, Ontario: Unpublished Master thesis, Western University, London, ON, Canada, 170 p.
		Oshust, P. et al., 2018, Côté Gold project, Ontario - technical report on feasibility study: Technical report NI 43-101, addressed to IAMGOLD Corp., 536 p.
		Pilote, P., Scott, C., Mueller, W.U., Lavoie, S., and Riopel, P., 1999, Géologie des formations Val-d’Or, Héva et Jacola -nouvelle interprétation du bloc de Malartic, in MRN ed., Explorer au Québec : le défi de la connaissance, séminaire d’information sur la recherche géologique, programme et résumés 1999, MRN report DV 99-03; Ministère des Ressources Naturelles: Québec, QC, Canada, p. 19–20.
		Pinheiro Harvey, M., Glover, R., Tai, W., and Harwood, B., 2019, Macassa Property, Ontario, Canada - updated NI 43-101 technical report: Technical report NI 43-101, addressed to Kirkland Lake Gold Ltd., 126 p.
		El Rassi, D., 2019, Technical report on the Douay Gold project, northwestern Québec, Canada: Technical report NI 43-101, addressed to Mapl Gold Mines Ltd., 154 p.
		Simard, A., 2001, Rapport sur les activités d’exploration minière au Québec: MERN report DV 2002-01; Ministère de l’Énergie et des Ressources Naturelles: Québec, QC, Canada, 177 p.
		De Souza, S., Dubé, B., McNicoll, V.J., Dupuis, C., Mercier-Langevin, P., Creaser, R.A., and Kjarsgaard, I.M., 2015, Geology, hydrothermal alteration, and genesis of the world-class Canadian Malartic stockwork-disseminated Archean gold deposit, Abitibi, Quebec, in Dubé, B. and Mercier-Langevin, P. eds., Targeted Geoscience Initiative 4: Contributions to the understanding of Precambrian lode gold …
		Thorpe, R.I., Guha, J., Franklin, J.M., and Loveridge, W.D., 1984, Use of a Superior province lead isotope framework in interpreting mineralization stages in the Chibougamau district, in Guha, J. and Chown, E.H. eds., Canadian Institute of Mining and Metallurgy Special Volume, Canadian Institute of Mining and Metallurgy: Westmount, QC, Canada, v. 34, p. 496–516.
		Tilton, G.R., and Bell, K., 1994, Sr-Nd-Pb isotope relationships in Late Archean carbonatites and alkaline complexes: Applications to the geochemical evolution of Archean mantle: Geochimica et Cosmochimica Acta, v. 58, p. 3145–3154.
		Tremblay, A., Ruffet, G., and Lemarchand, J., 2020, Timing and duration of Archean orogenic gold deposits in the Bourlamaque pluton, Val d’Or mining camp, Abitibi, Canada: Ore Geology Reviews, p. 103812.
		Williamson, K., Brousseau, K., Pelletier, C., Roy, L., Poirier, S., Dreisinger, D., and Arpin, M., 2013, Technical report and mineral resource estimate for the Duparquet project for Clifton Star Resources Inc: Clifton Star Resources Inc., NI 43-101 report, 220 p.
		Yardley, B.W.D., and Bodnar, R.J., 2014, Section 2. Crustal fluid compositions: The basics: Geochemical Perspectives, v. 3, p. 20-53.
		Zhang, J., Lin, S., Linnen, R., and Martin, R., 2014, Structural setting of the Young-Davidson syenite-hosted gold deposit in the western Cadillac-Larder Lake deformation zone, Abitibi greenstone belt, Superior Province, Ontario: Precambrian Research, v. 248, p. 39–59.
		Zweng, P.L., Mortensen, J.K., and Dalrymple, G.B., 1993, Thermochronology of the Camflo gold deposit, Malartic, Quebec; implications for magmatic underplating and the formation of gold-bearing quartz veins: Economic Geology, v. 88, p. 1700–1721.

## Sheet: S1
	Table S1. Main physical characteristics of the deposits described in the text.
			Clifford	Côté Gold	Central Camp	Troilus	Kiena	Don Rouyn	Doyon	Selbaie	McIntyre-Hollinger	Golden Arrow	MOP-II	Bourlamaque	Lac Shortt	Bachelor	East Sullivan	Upper Beaver	Launay	Wasamac	Beattie	Boyvinet	Young-Davidson	Ross	Kelore	Matachewan Consolidated	Cairo	Lake Shore	Macassa	Douay	Hwy-44 property	Thunder Creek	Kirkland Lake deposit	Canadian Malartic	Silidor
	Evidence for magmatic1 fluids	K-alteration	✓	✓	✓	✓	✓				✓	✓		(✓)	✓	✓	✓	✓	✓	✓	✓		✓			✓		✓	✓	✓	✓	✓	✓	✓
		Hematisation	✓					✓			✓	✓			✓	✓		✓	✓		✓	✓	✓	✓	✓	✓	✓	✓	✓	✓	✓		✓	✓	✓
		Sulfate (barite, anhydrite)							✓		✓					✓		✓						✓		✓	✓	✓	✓		✓		✓
		Polymetallic signature					✓			✓								✓		✓	✓	✓	✓	✓		✓			✓		✓	✓	✓	✓	(✓)
		Stable isotopes (O, S)	✓								✓	✓				✓	✓				✓		✓	✓		✓	✓	✓	✓		✓	✓	✓	✓	✓
		Au-telluride association									✓									✓			✓						✓				✓	✓
		Fluorite		(✓)												✓					(✓)						✓
		Base metals (Cu-Mo…)	✓	✓	✓	✓	✓	✓	✓	✓	✓	✓	✓	✓			✓	✓	✓		(✓)		✓	✓	✓	✓	✓		✓				✓	✓
		Zoning4			✓	✓	✓	✓		✓	✓		✓
	Evidence for metamorphic2 fluids	Silicification	✓			✓						✓	✓	✓		✓	✓				✓				✓	✓	✓	✓			✓	✓	✓	✓
		Fluid inclusions			✓																	✓
		Stable isotopes (O, S)										✓									✓		✓
	Non-specific characteristics3	Structurally-controlled			✓	✓		✓			✓		✓	✓	✓	✓			✓	✓	✓	✓	✓	✓	✓		✓	✓	✓	✓	✓	✓	✓	✓	✓
		Quartz-carbonate veins			✓			✓	✓		✓	✓	✓	✓	✓			✓		✓	✓	✓	✓	✓	✓				✓	✓			✓	✓	✓
		Invisible gold in sulfide																		✓	✓													✓
		Free gold			✓	✓												✓		✓	✓	✓							✓			✓	✓	✓
	Other characteristics	Disseminated sulfide	✓	✓	✓	✓	✓	✓	✓		✓	✓	✓	✓		✓	✓	✓	✓	✓	✓	✓	✓		✓	✓	✓			✓	✓	✓		✓
		Breccia	✓	✓	✓	✓	✓	(✓)	✓		✓	✓	✓			✓	✓	✓	✓	✓	✓	✓		✓	✓				✓	✓			✓		✓
		1 Magmatic fluids are generally oxidized, high temperature and high salinity fluids with a complex chemistry and can induce, for example, K-alteration and hematisation.
		2 Metamorphic fluids are reduced, low salinity and CO2-rich fluids with characteristic P-T (2 kbar, 300-350°C) [5].
		3 Characteristics that are frequent in OGS, but that may also be displayed by an IRGS formed in a tectonically active area.
		4 Zoning is generally concentric, with a core and a peripheral zone displaying distinct ore and/or alteration minerals.
		5 Characteristics as compiled from references cited in the text.

## Sheet: S2
	Table S2. Compilation of tonnage, grade and geochronological data.
			Gold		Copper
	Location	Deposit/prospect	Tonnage (Mt)	Grade (g/t)	Tonnage (Mt)	Grade (g/t)	Type (reference)	Intrusion1	Age	error (-)	error (+)	Reference	Mineralising event2 (first or second stage)	Reference
	NVZ3	Central Camp	53.54	1.55	53.54	1.78	Production (Leclerc et al. 2012)	Chibougamau (early phase)	2718	2	2	(Krogh and Davis, 1971; Krogh, 1982)	Remobelised (D24)									.
	SVZ	Clifford					occurence	Clifford stock	2686.9	1.2	1.2	(Ayer et al., 2005)
	NVZ	Côté Gold	355.4	0.87			Ressources (Oshust et al. 2018)	Chester	2740	2	2	(van Breemen et al., 2006)	2740 Ma (Re/Os on molybdenite)	(Katz 2016)
	SVZ	Don Rouyn			40	0.15	Production (Jébrak et al. 1996)	Powell (Flavrian-Powell intrusive complex)	2700.1	1	1	(McNicoll et al., 2014)
	SVZ	Doyon	24.56	5.93			Production (Simard 2001)	Mooshla intrusive complex	2696.9	1	1	(Lafrance et al. 2005)
	SVZ	Kiena	5.81	4.99			Production (Gosselin and Dubé 2005)	Granodiorite intermineral dyke	2686	2	2	(Morasse et al., 1995)	2694-2680 Ma (estimated using intermineral dyke and structural study)	(Morasse et al. 1995)
	NVZ	Selbaie	47.43	0.62	47.43	0.98	Production (Simard 2001)	Brouillan	2729	4	4	(Barrie and Krogh, 1996)
	SVZ	St-Jude					occurence	Flavrian pluton (mineralised part)	2696.6	0.9	0.9	(McNicoll et al., 2014)
	SVZ	Troilus (Lac)	23.79	1.19		0.12	Production (Simard 2001)	Porphyritic dyke	2782	6	6	(David and Parent 1997)
	SVZ	Bourlamaque (Ferderber Mine - Belmoral, Dumont)	2.35	6.4			Production (Gosselin and Dubé 2005)	Bourlamaque	2704.7	0.8	0.8	(David 2019)	ca. 2667 Ma to 2452 Ma fluid circulation events, with a well established hydrothermal system at ca. 2650 Ma (Ar/Ar amphibole and mica ages)	(Tremblay et al., 2020)
	SVZ	Golden Arrow					Minor porducer	Trondhjemite intrusion	undated
	SVZ	McIntyre-Hollinger-Coniaurum complex	96.52	10.02			Production (Gosselin and Dubé 2005)	Pearl Lake porphyry	2689	1	1	(Corfu et al., 1989)
	NVZ	MOP-II	10.9	0.45			Ressource (https://www.soquem.qc.ca/projets/)	Tonalite intrusion	undated
	NVZ	Bachelor	0.87	4.68			Production (Gosselin and Dubé 2005)	O'Brien pluton	undated
	SVZ	East Sullivan					occurence	East Sullivan	2684	1	1	(Pilote et al., 1999)
	NVZ	Lac Shortt	2.7	4.62			Production (Gosselin and Dubé 2005)	Syenite-carbonatite complex	2661	0.1	0.1	(Tilton and Bell 1994)	2665-2680 Ma (Pb, galena - error not reported)	(Thorpe et al. 1984, Morasse 1988)
	SVZ	Messegay (Launay)					occurence	Launay	2710	26	26	(Carignan and Gariepy, 1993)
	SVZ	Upper Beaver	0.53	8.3			Production (Gosselin and Dubé 2005)	Diorite-monzonite suite	undated				2674-2671 Ma	Talisker (2014) unpublished reports (reported by Feick 2016)
	SVZ	Beattie	9.71	4.32			Production (Gosselin and Dubé 2005)	Beattie syenite	2681.6	1	1	(Mueller et al. 1996)	D2 to late-D3 (estimated)	(Bigot and Jébrak 2015)
	SVZ	Beattie	60.9	1.59			Resources (Williamson et al. 2013)
	NVZ	Boyvinet					occurence	Boyvinet stock	undated				D2 to late-D3 (estimated)
	SVZ	Cairo					occurence	Cairo stock	2676.3	1.4	1.4	(Berger, 2006)
	NVZ	Douay	8.6	1.52			Ressources (El Rassi 2019)	Douay	2676	6	5	(Davis et al., 2000)	D2 possibly (estimated)
	SVZ	Hwy-44 property					occurence	Syenite intrusion	undated
	SVZ	Kelore	0.76	5.83			Reserve (Gosselin and Dubé 2005)	Syenite	undated
	SVZ	Lake Shore	15.61	17.1			Production (Ispalotov et al. 2008)	Alkaline intrusion	undated
	SVZ	Macassa	14.59	14.06			Production (Pinheiro Harvey et al. 2019)	Composite syenite intrusion	undated
	SVZ	Matachewan Consolidated	3.29	3.57			Production (Gosselin and Dubé 2005)	Syenite stock	undated
	SVZ	Ross	5.04	5.41			Production (Gosselin and Dubé 2005)	Felsic intrusion	undated
	SVZ	Wasamac	4.71	8.85			Production (Gosselin and Dubé 2005)	Syenite dykes	undated
	SVZ	Young-Davidson	5.64	3.43			Production (Gosselin and Dubé 2005)	Young-Davidson syenite	2678.8	1.6	1.6	(Zhang et al., 2014)
	SVZ	Camflo - Malartic Hygrade	9.38	5.89			Production (Gosselin and Dubé 2005)	Camflo monzonite	2685	10	10	(Zweng et al., 1993)	2621 ±4 Ma (U/Pb on hydrothermal titanite)	(Zweng et al. 1993)
	SVZ	Canadian Malartic	343.7	0.97			Reserves (Belzile and Gignac 2011)	Monzodiorite porphyry	2676-2679 Ma			(Helt et al., 2014; De Souza et al., 2015)	~2664 Ma (Re/Os on molybdenite from the high-grade zone)	(DeSouza et al. 2015)
	SVZ	Kirkland Lake deposit	2.85	12.8			Production (Ispalotov et al. 2008)	Kirkland Lake intrusive complex	undated
	SVZ	Silidor	4.9	6.2			Reserves (Gosselin and Dubé 2005)	Powell	2700.1	1	1	(McNicoll et al., 2014)
	SVZ	Thunder Creek (Lake Shore Gold’s Thunder Creek)	2.88	5.64			Ressources (Crick et al. 2011)	Porphyry in Timmins area	2688-2691 Ma			(Corfu et al., 1989)	2673 +6/-2 Ma (age of albitite dykes closely temporally related to gold mineralization)	(Corfu et al. 1989)
		1 Igneous ages (U/Pb dating on zircon) that, for porphyries and IRGS, also correspond to the age of the mineralization.
		2 Age of the main mineralizing event or, for multistage deposits, age of the second (post-magmatic) mineralizing event.
		3 Acronyms stand for north volcanic zone (NVZ) and south volcanic zone (SVZ).
		4 Acronyms stand for the main deformation event (D2) and its waning stage (D3). Ages differs in the NVZ and SVZ (see accompanying article).

## Sheet: S3
	Table S3. Compilation of isotopic data.
		δ18Ofluid (‰) 1	Temperature 2	Type (δ18O)	δ34Spyrite (‰) 3	Reference
	McIntyre-Hollinger				-5.1 to +5.2	(Cameron and Hattori 1987)
	Golden Arrow	+7.5 to +8.5	320 ± 20°C	quartz		(McNeil and Kerrich 1986)
	Bachelor	+5.92 to +9.75	410°C	quartz		(Fayol and Jébrak 2017)
	East Sullivan	+10.9 to +11.3	/	calcite		(Bigot 2020)
	Beattie	+6.9 to +10.8	350°C	quartz		(Bigot and Jébrak 2015)
	Young-Davidson	+6.6 to +11.8	320 to 1142°C	several minerals	-0.6 to +1.9; -3.7 to +5.1 (distinct studies)	(Cameron and Hattori 1987, Naderi 2012, Martin 2012)
	Ross mine				-0.2 to -3.1	(Cameron and Hattori 1987)
	Kelore mine				-9.4 to -10.2	(Cameron and Hattori 1987)
	Matachewan Consolidated				-3.7 to +5.1	(Cameron and Hattori 1987)
	Cairo				-4 to +5	(Cameron and Hattori 1987)
	Lake Shore				-9.1 to -14.4	(Cameron and Hattori 1987)
	Macassa	+8.59 to +13.96	380 to 490°C	quartz		(Kerrich and Watson 1984)
	Hwy-44 property				-0.1 to -6.9	(Campbell 2014)
	Thunder Creek				-3.0 to -6.1	(Campbell 2014)
	Kirkland Lake deposit				-9.1 to -14.4	(Cameron and Hattori 1987)
	Canadian Malartic	+11.8 to +13.4 (main); +8.8 to +12 (late)	~475°C	quartz	-4.5 to +3.3; -11.5 to -12.4 (distinct studies)	(Cameron and Hattori 1987, Helt et al. 2014)
	Silidor	+7.7 to +10.9	/	quartz	-6.1 to -9.4	(Carrier et al., 2000)
	1 According to Yardley and Bodnar (2014), δ18O values can be interpreted as follows:
	· Values ˂ +2‰ for meteoric-hydrothermal water;
	· Values of +5 to +10‰ for magmatic water;
	· Values of +2 to +20‰ for metamorphic water.
	2 Metamorphic fluids are low temperature fluids (300-350°C) compared to magmatic fluids (˃350-400°C).
	3 The δ34Spyrite values that are significantly different from 0‰ are interpreted as evidence for oxidised fluids by Cameron and Hattori (1987).
